# Supplementary material for: Thermo-responsive shape and optical memories of photonic composite films enabled by glassy liquid crystalline polymer networks
Source: Royal Society of Chemistry journal article supplement (doi:10.1039/c6sm01887d), 2016-01-01
Supplement: c6sm01887d2.pdf [file c6sm01887d2.pdf]

## Supporting Information

### **Thermo-responsive Shape and Optical Memories of Photonic Composite Film Enabled by Glassy Liquid Crystalline Polymer Networks**

**Wanyuan Wei, Anshi Shi, Tianhang Wu, Jie Wei, Jinbao Guo\***

*College of Materials Science and Engineering, Beijing University of Chemical  
Technology, Beijing 100029, P. R. China.*

\*Correspondence author. Email: [guojb@mail.buct.edu.cn](mailto:guojb@mail.buct.edu.cn),

# 1 Characterization of AC6CN, A6OCM, C4M and C6M

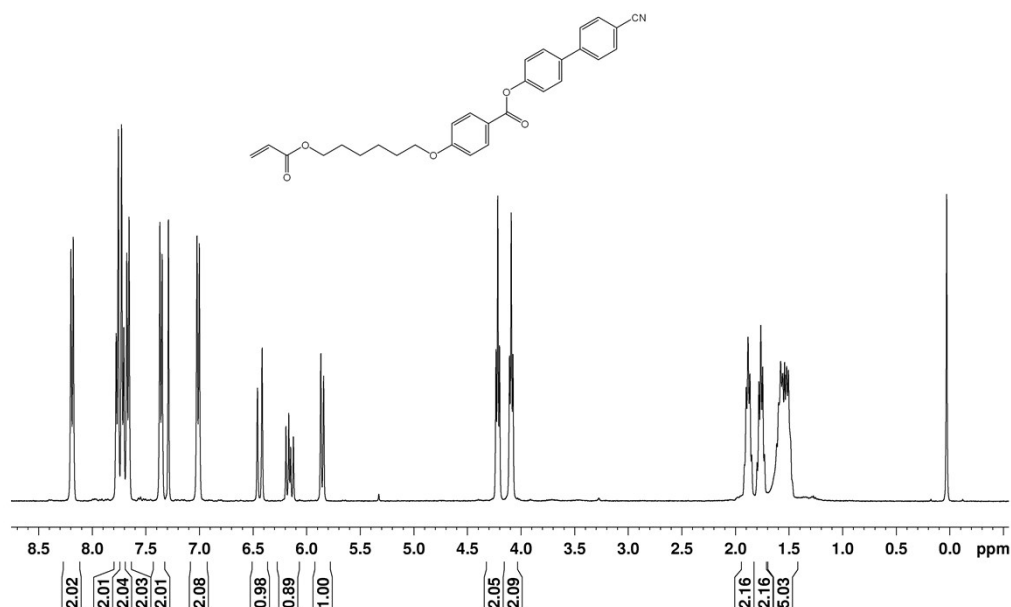

Fig. S1 (a):  $^1\text{H}$  NMR of AC6CN in  $\text{CDCl}_3$

**AC6CN:**  $^1\text{H}$  NMR (400 MHz,  $\text{CDCl}_3$ ),  $\delta$  (ppm): 8.19 (d,  $J = 8.6$  Hz, 2H), 7.77 (d,  $J = 7.9$  Hz, 2H), 7.71 (d,  $J = 8.3$  Hz, 2H), 7.66 (d,  $J = 8.3$  Hz, 2H), 7.35 (d,  $J = 8.3$  Hz, 2H), 7.01 (d,  $J = 8.6$  Hz, 2H), 6.44 (d,  $J = 17.3$  Hz, 1H), 6.20-6.11 (m, 1H), 5.85 (d,  $J = 10.5$  Hz, 1H), 4.22 (t,  $J = 6.6$  Hz, 2H), 4.09 (t,  $J = 6.3$  Hz, 2H), 1.93-1.45 (m, 8H).

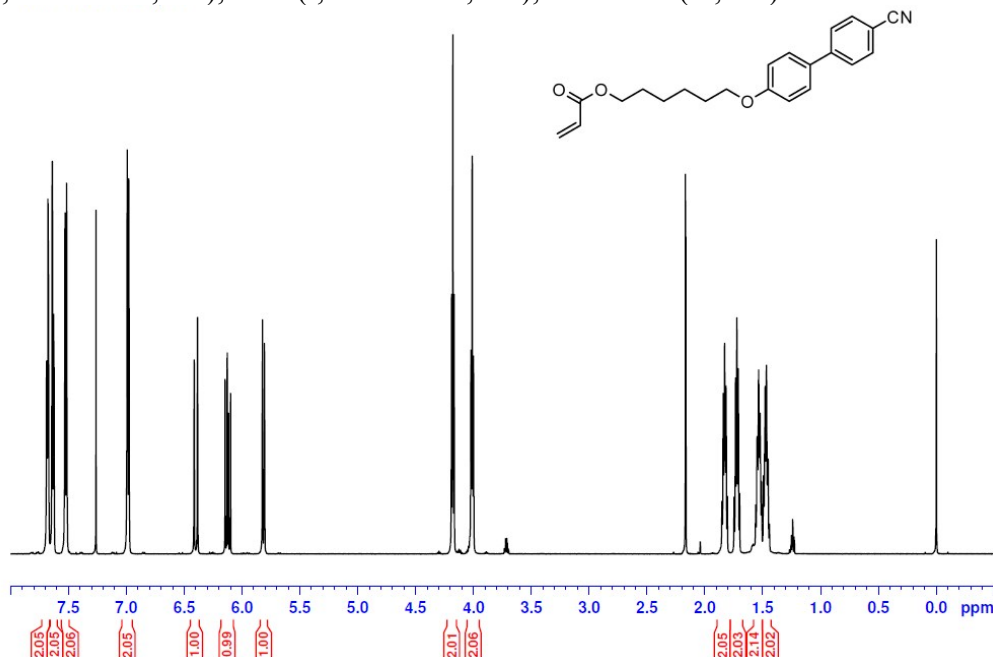

Fig. S1 (b):  $^1\text{H}$  NMR of A6OCB in  $\text{CDCl}_3$

**A6OCB:**  $^1\text{H}$  NMR (600 MHz,  $\text{CDCl}_3$ ),  $\delta$ : 7.68 (d,  $J = 7.1$  Hz, 2H, aryl H), 7.63 (d,  $J = 6.6$  Hz, 2H, aryl H), 7.52 (d,  $J = 7.9$  Hz, 2H, aryl H), 6.98 (d,  $J = 8.5$  Hz, 2H, aryl H), 6.40 (d,

$J=17.1$  Hz, 1H, vinyl), 6.12 (dd,  $J=10.5$  Hz, 17.5 Hz, 1H, vinyl), 5.81 (d,  $J=10.5$  Hz, 1H, vinyl), 4.17 (t,  $J=6.7$  Hz, 2H,  $-\text{OCH}_2$ ), 4.01 (t,  $J=6.7$  Hz, 2H,  $-\text{OCH}_2$ ), 1.83 (m, 2H,  $\text{CH}_2$ ), 1.72 (m, 2H,  $\text{CH}_2$ ), 1.60–1.42 (m, 4H,  $\text{CH}_2$ )

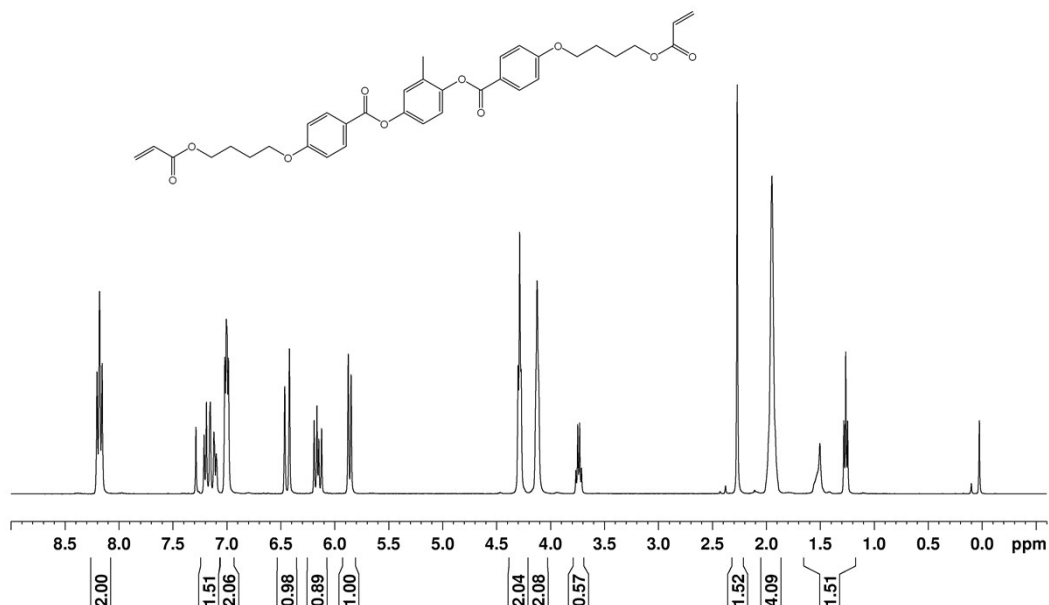

Fig. S1 (c):  $^1\text{H}$  NMR of C4M in  $\text{CDCl}_3$

**C4M:**  $^1\text{H}$  NMR (400 MHz,  $\text{CDCl}_3$ ),  $\delta$  (ppm): 8.18 (t,  $J=9.3$  Hz, 4H), 7.22-7.08 (m, 3H), 7.04-6.97 (m, 4H), 6.44 (d,  $J=17.3$  Hz, 2H), 6.20-6.11 (m, 2H), 5.86 (d,  $J=10.2$  Hz, 2H), 4.29 (t,  $J=5.3$  Hz, 4H), 4.13 (t,  $J=5.3$  Hz, 4H), 2.27 (s, 3H), 2.00-1.88 (m, 8H).

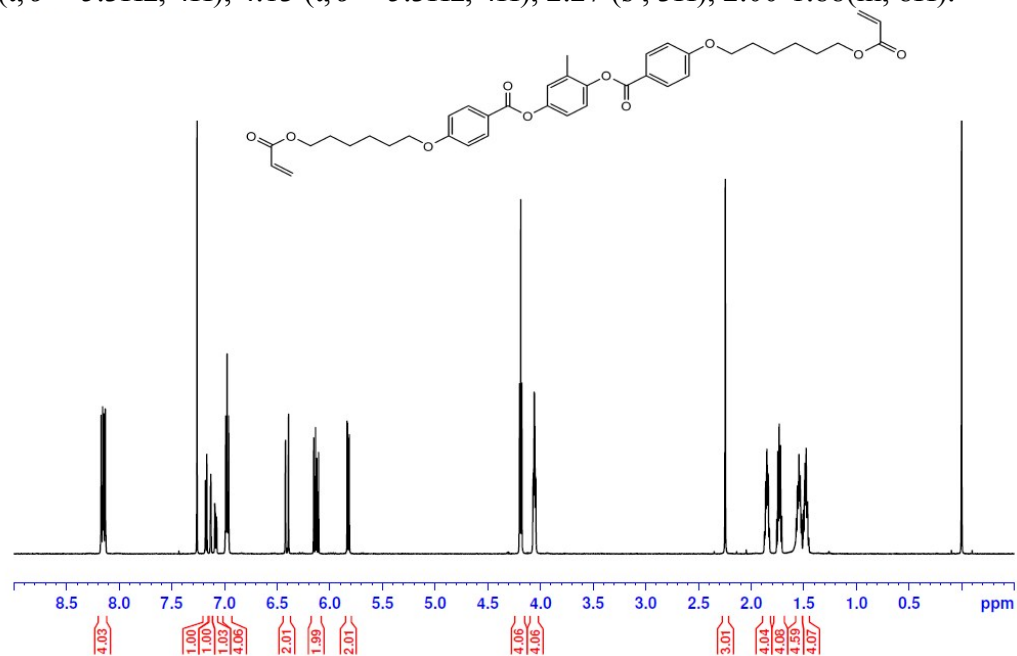

Fig. S1 (d):  $^1\text{H}$  NMR of C6M in  $\text{CDCl}_3$

**C6M:**  $^1\text{H}$  NMR (600 MHz,  $\text{CDCl}_3$ ),  $\delta$ : 8.15 (dd,  $J=8.9$  Hz, 15.5 Hz, 4H, aryl H), 7.17 (d,  $J=8.6$  Hz, 1H, aryl H), 7.13 (d,  $J=2.5$  Hz, 1H, aryl H), 7.08 (dd,  $J=2.78$  Hz, 8.61 Hz, 1H,

aryl H), 6.97 (t,  $J = 8.2$  Hz, 4H, aryl H), 6.41 (dd,  $J = 1.2$  Hz, 17.3 Hz, 2H, vinyl), 6.12 (dd,  $J = 10.4$  Hz, 17.4 Hz, 2H, vinyl), 5.83 (dd,  $J = 1.4$  Hz, 10.4 Hz, 2H, vinyl), 4.19 (t,  $J = 6.7$  Hz, 4H,  $-\text{OCH}_2$ ), 4.06 (m, 4H,  $-\text{OCH}_2$ ), 2.24 (s, 3H,  $-\text{CH}_3$ ), 1.85 (m, 4H,  $\text{CH}_2$ ), 1.73 (m, 4H,  $\text{CH}_2$ ), 1.60–1.42 (m, 8H,  $\text{CH}_2$ ).

## 2 Thermodynamic properties of the LCN

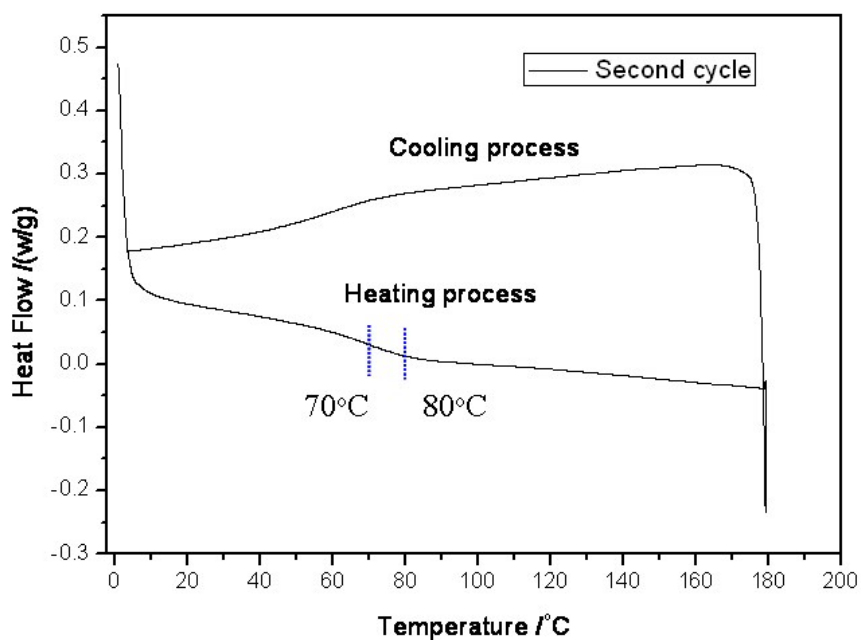

Fig. S2 DSC curve of the LCN

## 3 Angle dependence of the PBG in the photonic composite film

Here the photonic film sample was rotated by every  $10^{\circ}$  according to the measured standard, and all the reflectance measurements were manipulated at the condition that the angle between detecting beam and samples was  $90^{\circ}$ . As shown in Fig. S3, the PBG position undergoes a blue-shift and the corresponding peak intensity has a great decrease as the rotated angle is increased. All these observations demonstrate that both the location and intensity of PBG peak of the photonic film has angle dependence.

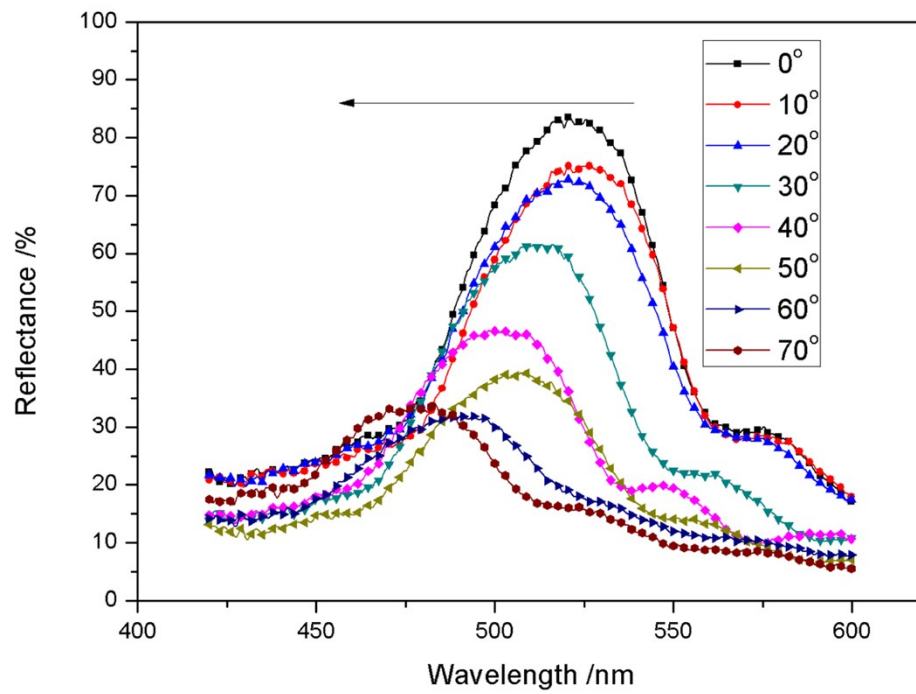

Fig. S3 PBG as a function of angle in the photonic composite film
